# Supplementary material for: The alerting effect of the wake maintenance zone during 40 hours of sleep deprivation
Source: PubMed Central journal article supplement (PMC6054682; doi:10.1038/s41598-018-29380-z), 2018-07-20
Supplement: 41598_2018_29380_MOESM1_ESM.pdf [file 41598_2018_29380_MOESM1_ESM.pdf]

## Supplemental Material

### **The alerting effect of the wake maintenance zone during 40 hours of sleep deprivation**

Jan de Zeeuw<sup>1,4</sup>, Sophia Wisniewski<sup>1,3</sup>, Alexandra Papakonstantinou<sup>1,3</sup>, Frederik Bes<sup>1,3</sup>, Amely Wahnschaffe<sup>1,3</sup>, Mandy Zaleska<sup>4</sup>, Dieter Kunz<sup>1,3,4#</sup>, Mirjam Münch<sup>1,2,3#\*</sup>

<sup>1</sup>Charité – Universitätsmedizin Berlin, corporate member of Freie Universität Berlin, Humboldt-Universität zu Berlin, and Berlin Institute of Health; Institute of Physiology, Sleep Research & Clinical Chronobiology; <sup>2</sup>Charité – Universitätsmedizin Berlin, corporate member of Freie Universität Berlin, Humboldt-Universität zu Berlin, and Berlin Institute of Health, Institute of Medical Immunology, Laboratory of Chronobiology; <sup>3</sup>Clinic for Sleep & Chronomedicine, St. Hedwig-Krankenhaus, Berlin; <sup>4</sup>Intellux GmbH, Berlin, Germany; #co-last authors

\*Corresponding author:

Mirjam Münch, PhD

Charité Universitätsmedizin Berlin

Institute of Physiology

Sleep Research & Clinical Chronobiology

c/o St. Hedwig-Krankenhaus

Grosse Hamburger Strasse 5-11

10115 Berlin

Phone: 0049 2311 2901

Fax: 0049 2311 2903

Email: [mirjam.muench@charite.de](mailto:mirjam.muench@charite.de)

| <b>Cognitive Tests</b>    | <b>Main Effect of TIME</b>    |
|---------------------------|-------------------------------|
| PVT Median Reaction Times | $F_{1,20} = 4.042, p < 0.001$ |
| PVT Lapses                | $F_{1,20} = 3.208, p < 0.001$ |
| Go/No-Go                  | $F_{1,20} = 4.815, p < 0.001$ |
| 2-Back                    | $F_{1,20} = 3.519, p < 0.001$ |
| 3-Back                    | ns                            |
| Word-Memory               | ns                            |
| Addition Task             | $F_{1,20} = 3.611, p < 0.001$ |
| Abstract Reasoning        | ns                            |
| Negative Affect           | $F_{1,20} = 2.810; p < 0.001$ |

**Table S1.1. Cognitive performance across 40 hours.** The first column shows: PVT median reaction times in milliseconds; number of PVT lapses; % correct on the Go/No-Go; % correct on the 2-Back test; % correct on the 3-Back Test; % correct on the Word-Memory Test; Efficiency on the Addition Task (% correct / Reaction Time); % correct on the Abstract Reasoning Test; % correct on Negative Affect. The second column shows the F- and p-values for the statistical variation of the time course of cognitive performance tests across 40 h of extended wakefulness (= main effect of TIME); ns = not significant.

| Cognitive Tests           | WMZ 1 vs. WMZ 2                  |                 |                        |                        | Hour before WMZ 1 vs. Hour before WMZ 2 |                 |                                    |                                    |
|---------------------------|----------------------------------|-----------------|------------------------|------------------------|-----------------------------------------|-----------------|------------------------------------|------------------------------------|
|                           | F- and p-values                  | Effect Size (d) | WMZ 1 Mean ( $\pm$ SD) | WMZ 2 Mean ( $\pm$ SD) | F- and p-values                         | Effect Size (d) | Hour before WMZ 1 Mean ( $\pm$ SD) | Hour before WMZ 2 Mean ( $\pm$ SD) |
| PVT Median Reaction Times | ns                               | 0.293           | 271.3 (24.2)           | 279.0 (28.4)           | ns                                      | 0.329           | 270.9 (20.5)                       | 279.1 (29.0)                       |
| PVT Lapses                | p = 0.047                        | 0.968           | 0.3 (0.7)              | 2.2 (2.7)              | p = 0.008                               | 1.108           | 0.5 (0.9)                          | 5.5 (6.3)                          |
| Go/No-Go                  | $F_{1,11} = 7.084$<br>p = 0.022  | -0.747          | 94.5 (4.9)             | 87.9 (11.5)            | $F_{1,10} = 6.774$<br>p = 0.027         | -0.697          | 92.3 (6.6)                         | 85.1 (12.9)                        |
| 2-Back                    | $F_{1,16} = 13.921$<br>p = 0.002 | -1.160          | 97.7 (2.3)             | 92.4 (6.0)             | ns                                      | -0.623          | 95.5 (5.2)                         | 91.8 (6.4)                         |
| 3-Back                    | ns                               | -0.501          | 87.0 (5.8)             | 82.4 (11.6)            | $F_{1,13} = 8.180$<br>p = 0.014         | -0.471          | 85.2 (10.2)                        | 79.7 (12.9)                        |
| Word-Memory               | ns                               | -0.094          | 90.0 (16.5)            | 88.3 (18.9)            | $F_{1,10} = 10.495$<br>p = 0.021        | -0.804          | 95.0 (8.0)                         | 85.0 (5.7)                         |
| Addition Task             | ns                               | -0.185          | 0.020 (0.007)          | 0.019 (0.008)          | $F_{1,11} = 10.729$<br>p = 0.007        | -1.135          | 0.023 (0.004)                      | 0.017 (0.006)                      |
| Abstract Reasoning        | ns                               | -0.263          | 58.1 (27.8)            | 51.9 (18.6)            | ns                                      | -0.336          | 61.4 (21.6)                        | 51.9 (18.0)                        |
| Negative Affect           | ns                               | -0.646          | 74.2 (12.4)            | 66.2 (12.4)            | ns                                      | -0.885          | 74.3 (9.9)                         | 66.0 (8.9)                         |

**Table S1.2.1. Cognitive performance: comparison between WMZs and between prior hours.** The first column of the table lists the cognitive performance tests. The second column shows the F- and p-values of the comparison between WMZ 1 and WMZ 2. The third column shows the effect size (Cohen's d). The fourth and fifth columns show the means ( $\pm$  SD). The sixth column shows the F- and p-values of the comparison between the hour before WMZ 1 and the hour before WMZ 2. The seventh column shows the effect size (Cohen's d). The eighth and ninth columns show the means ( $\pm$  SD). Since PVT lapses were not normally distributed they were analyzed with the Wilcoxon Test. The cognitive performance tests are presented as: PVT median reaction times in milliseconds; number of PVT lapses; % correct on the Go/No-Go; % correct on the 2-Back test; % correct on the 3-Back test; % correct on the Word-Memory test; Efficiency on the Addition Task (% correct / reaction time); % correct on the Abstract Reasoning Test; % correct on Negative Affect; ns = not significant.

| Cognitive Tests           | Preceding Hour vs. WMZ 1          |                 |                                      |                        | Preceding Hour vs. WMZ 2 |                 |                                      |                        |
|---------------------------|-----------------------------------|-----------------|--------------------------------------|------------------------|--------------------------|-----------------|--------------------------------------|------------------------|
|                           | F- and p-values                   | Effect Size (d) | Hour prior to WMZ 1 Mean ( $\pm$ SD) | WMZ 1 Mean ( $\pm$ SD) | F- and p-values          | Effect Size (d) | Hour prior to WMZ 2 Mean ( $\pm$ SD) | WMZ 2 Mean ( $\pm$ SD) |
| PVT Median Reaction Times | ns                                | 0.018           | 270.9 (20.5)                         | 271.3 (24.2)           | ns                       | -0.004          | 279.1 (29.0)                         | 279.0 (28.4)           |
| PVT Lapses                | ns                                | -0.289          | 0.5 (0.9)                            | 0.3 (0.7)              | $p = 0.012$              | -0.687          | 5.5 (6.3)                            | 2.2 (2.7)              |
| Go/No-Go                  | $F_{1,12} = 5.142$<br>$p = 0.043$ | 0.380           | 92.3 (6.6)                           | 94.5 (4.9)             | ns                       | 0.227           | 85.1 (12.9)                          | 87.9 (11.5)            |
| 2-Back                    | ns                                | 0.550           | 95.5 (5.2)                           | 97.7 (2.3)             | ns                       | 0.098           | 91.8 (6.4)                           | 92.4 (6.0)             |
| 3-Back                    | ns                                | 0.224           | 85.2 (10.2)                          | 87.0 (5.8)             | ns                       | 0.223           | 79.7 (12.9)                          | 82.4 (11.6)            |
| Word-Memory               | ns                                | -0.386          | 95.0 (8.0)                           | 90.0 (16.5)            | ns                       | 0.191           | 85.0 (5.7)                           | 88.3 (18.9)            |
| Addition Task             | ns                                | -0.501          | 0.023 (0.004)                        | 0.020 (0.007)          | ns                       | 0.253           | 0.017 (0.006)                        | 0.019 (0.008)          |
| Abstract Reasoning        | ns                                | -0.131          | 61.4 (21.6)                          | 58.1 (27.8)            | ns                       | -0.154          | 51.9 (18.0)                          | 51.9 (18.6)            |
| Negative Affect           | ns                                | 0.013           | 74.3 (9.9)                           | 74.2 (12.4)            | ns                       | 0.015           | 66.0 (8.9)                           | 66.2 (12.4)            |

**Table S1.2.2. Cognitive performance: comparisons of each WMZ with its preceding hour.**

The first column of the table lists the cognitive performance tests. The second column shows the F- and p-values of the comparison between WMZ 1 and its preceding hour. The third column shows the effect size (Cohen's d; see also Fig. S3). The fourth and fifth columns show the means ( $\pm$  SD). The sixth column shows the F- and p-values of the comparison between WMZ 2 and its preceding hour. The seventh column shows the effect size (Cohen's d). The eighth and ninth columns show the means ( $\pm$  SD). Since PVT lapses were not normally distributed they were analyzed with the Wilcoxon Test. The cognitive performance tests are presented as: PVT median reaction times in ms; number of PVT lapses; % correct on the Go/No-Go; % correct on the 2-Back test; % correct on the 3-Back test; % correct on the Word-Memory test; Efficiency on the Addition Task (% correct / reaction time); % correct on the Abstract Reasoning Test; % correct on Negative Affect; ns = not significant.

| Cognitive Tests           | Change in WMZ 1 vs. Change in WMZ 2 |                 |                        |                        |
|---------------------------|-------------------------------------|-----------------|------------------------|------------------------|
|                           | F- and p-values                     | Effect Size (d) | WMZ 1 Mean ( $\pm$ SD) | WMZ 2 Mean ( $\pm$ SD) |
| PVT Median Reaction Times | ns                                  | 0.057           | 1.0 (0.04)             | 1.0 (0.04)             |
| PVT Lapses                | p = 0.009                           | -0.986          | -0.3 (1.1)             | -3.3 (4.3)             |
| Go/No-Go                  | ns                                  | 0.207           | 1.03 (0.05)            | 1.04 (0.08)            |
| 2-Back                    | ns                                  | -0.119          | 1.02 (0.06)            | 1.01 (0.06)            |
| 3-Back                    | ns                                  | 0.228           | 1.02 (0.11)            | 1.05 (0.16)            |
| Word-Memory               | ns                                  | 0.491           | 0.95 (0.17)            | 1.06 (0.26)            |
| Addition Task             | $F_{1,11} = 6.843$<br>p = 0.025     | 0.808           | 0.9 (0.3)              | 1.1 (0.2)              |
| Abstract Reasoning        | ns                                  | 0.047           | 1.06 (0.72)            | 1.09 (0.48)            |
| Negative Affect           | ns                                  | -0.012          | 1.01 (0.16)            | 1.01 (0.19)            |

**Table S1.2.3. Cognitive performance: comparisons of changes between wake maintenance zones.** The first column of the table lists the cognitive performance tests. The second column shows the F- and p-values for the comparison of the changes during WMZ 1 and WMZ 2. The third column shows the effect size (Cohen's d). The fourth and fifth columns show the means ( $\pm$  SD). For PVT lapses the Wilcoxon test was performed. The cognitive performance tests are presented as relative values (each WMZ relative to its preceding hour); ns = not significant.

| <b>Subjective Sleepiness/EEG Activity</b> | <b>Main Effect of TIME</b>      |
|-------------------------------------------|---------------------------------|
| Subjective Sleepiness                     | $F_{1,41} = 8.596, p < 0.001$   |
| EEG delta/theta activity (4 - 5 Hz)       | $F_{41,232} = 6.812, p < 0.001$ |
| EEG alpha activity (10 - 14 Hz)           | $F_{41,208} = 2.861, p < 0.001$ |
| EEG sigma/beta activity (15.5 - 23 Hz)    | $F_{41,213} = 2.607, p < 0.001$ |

**Table S2.1. Subjective and objective sleepiness across 40 hours.** F- and p-values for the time course of subjective sleepiness and EEG frequency ranges across 40 h of extended wakefulness (= main effect of TIME).

| Subjective Sleepiness/EEG Activity     | WMZ 1 vs. WMZ 2                    |                 | Hour before WMZ 1 vs. Hour before WMZ 2 |                 |
|----------------------------------------|------------------------------------|-----------------|-----------------------------------------|-----------------|
|                                        | F- and p-values                    | Effect Size (d) | F- and p-values                         | Effect Size (d) |
| Subjective Sleepiness                  | $F_{1,17} = 9.495$<br>$p = 0.007$  | 1.178           | $F_{1,11} = 5.388$<br>$p = 0.041$       | 1.028           |
| EEG delta/theta activity (4 - 5 Hz)    | $F_{1,27} = 21.460$<br>$p < 0.001$ | 1.177           | $F_{1,19} = 12.213$<br>$p = 0.002$      | 1.484           |
| EEG alpha activity (10 - 14 Hz)        | ns                                 | 0.242           | ns                                      | 0.744           |
| EEG sigma/beta activity (15.5 - 23 Hz) | ns                                 | 0.373           | $F_{1,11} = 8.063$<br>$p = 0.017$       | 1.097           |

**Table S2.2.1. Subjective and objective sleepiness: comparison between WMZs and between prior hours.** The first column of the table lists the subjective sleepiness and EEG activity ranges. The second column shows the F- and p-values for the comparison between WMZ 1 and WMZ 2 with the effect size in the third column (Cohen's d). The fourth column shows the F- and p-values of the comparison between the hour prior to WMZ 1 and the hour prior to WMZ 2, with the effect size in the fifth column (Cohen's d); ns = not significant.

| Subjective Sleepiness/EEG Activity     | Preceding Hour vs. WMZ 1            |                 | Preceding Hour vs. WMZ 2             |                 |
|----------------------------------------|-------------------------------------|-----------------|--------------------------------------|-----------------|
|                                        | F- and p-values                     | Effect Size (d) | F- and p-values                      | Effect Size (d) |
| Subjective Sleepiness                  | ns                                  | 0.045           | ns                                   | -0.123          |
| EEG delta/theta activity (3 - 7 Hz)    | $F_{1,37} = 8.762$ ,<br>$p = 0.005$ | -0.850          | ns                                   | -1.037          |
| EEG delta activity (4 - 5 Hz)          | $F_{1,38} = 4.519$ ,<br>$p = 0.040$ | -0.643          | $F_{1,38} = 11.901$ ,<br>$p = 0.001$ | -1.021          |
| EEG alpha activity (10 - 14 Hz)        | ns                                  | -0.443          | $F_{1,35} = 5.900$ ,<br>$p = 0.020$  | -0.792          |
| EEG sigma/beta activity (15.5 - 23 Hz) | ns                                  | -0.058          | $F_{1,31} = 7.612$ ,<br>$p = 0.010$  | -0.805          |

**Table S2.2.2. Subjective and objective sleepiness: comparisons of each WMZ with its preceding hour.** The first column of the table lists the subjective sleepiness and EEG activity ranges. The second column shows the F- and p-values for the comparison between WMZ 1 and the preceding hour, with the effect size in the third column (Cohen's d). The fourth column shows the F- and p-values of the comparison between WMZ 2 and the preceding hour, with the effect size in the fifth column (Cohen's d); ns = not significant.



| Subjective Sleepiness/EEG Activity       | Change in WMZ 1 vs. Change in WMZ 2 |
|------------------------------------------|-------------------------------------|
| Subjective Sleepiness                    | ns                                  |
| EEG sigma/beta activity (17.5 - 22.5 Hz) | $F_{1,10} = 6.715, p = 0.027$       |

**Table S2.2.3. Subjective and objective sleepiness: comparisons of changes between wake maintenance zones.** The first column of the table lists the subjective sleepiness and EEG activity ranges. The second column shows the F- and p-values for the comparison of the changes during WMZ 1 and WMZ 2; ns = not significant.

|                                        | Main Effect of WMZ             | Main Effect of TIME            |
|----------------------------------------|--------------------------------|--------------------------------|
| PVT Lapses                             | $F_{1,39} = 7.766, p = 0.008$  | $F_{1,39} = 10.134, p = 0.003$ |
| Subjective Sleepiness                  | ns                             | ns                             |
| EEG delta/theta activity (4 - 5 Hz)    | $F_{1,67} = 11.414, p = 0.001$ | $F_{3,63} = 2.865, p = 0.044$  |
| EEG alpha activity (10 - 14 Hz)        | $F_{1,68} = 2.075, p = 0.035$  | $F_{3,65} = 4.635, p = 0.005$  |
| EEG sigma/beta activity (15.5 - 23 Hz) | $F_{1,68} = 11.679, p = 0.001$ | $F_{3,66} = 1.571, p = 0.034$  |

**Table S2.3. EEG power density reductions during the WMZ coincided with stable subjective sleepiness and improved cognitive performance.** The first column lists the cognitive performance, subjective sleepiness and EEG activity ranges. The second column shows whether the magnitude of the decline during the WMZs was different between WMZ 1 compared to WMZ 2 (main effect of WMZ). The third column shows whether there was a significant decline over time during the WMZ (compared to the start of the WMZ; main effect of TIME). Only PVT lapses showed a significant interaction ( $F_{1,39} = 7.766, p = 0.008$ ); ns = not significant.

| <b>Subjective Sleepiness vs.:</b>              | <b>r</b>   | <b>p-values</b> |
|------------------------------------------------|------------|-----------------|
| PVT Median Reaction Times                      | r = 0.430  | p < 0.001       |
| PVT Lapses                                     | r = 0.479  | p < 0.001       |
| Go/No-Go                                       | r = -0.500 | p < 0.001       |
| 2-Back                                         | r = -0.250 | p < 0.001       |
| 3-Back                                         | r = -0.106 | ns              |
| Word-Memory                                    | r = -0.259 | p < 0.001       |
| Addition Task                                  | r = 0.002  | ns              |
| Abstract Reasoning                             | r = -0.121 | ns              |
| Negative Affect                                | r = -0.142 | p = 0.031       |
| <b>Delta/Theta Activity (4 - 5 Hz) vs.:</b>    | <b>r</b>   | <b>p-values</b> |
| Subjective Sleepiness                          | r = 0.506  | p < 0.001       |
| PVT Median Reaction Times                      | r = 0.455  | p < 0.001       |
| PVT Lapses                                     | r = 0.519  | p < 0.001       |
| Go/No-Go                                       | r = -0.431 | p < 0.001       |
| 2-Back                                         | r = -0.304 | p < 0.001       |
| 3-Back                                         | r = -0.143 | ns              |
| Word-Memory                                    | r = -0.277 | p < 0.001       |
| Addition Task                                  | r = -0.044 | ns              |
| Abstract Reasoning                             | r = -0.175 | p = 0.017       |
| Negative Affect                                | r = -0.309 | p < 0.001       |
| <b>Alpha Activity (10 - 14 Hz) vs.:</b>        | <b>r</b>   | <b>p-values</b> |
| Subjective Sleepiness                          | r = 0.060  | ns              |
| PVT Median Reaction Times                      | r = 0.167  | p = 0.023       |
| PVT Lapses                                     | r = 0.232  | p = 0.002       |
| Go/No-Go                                       | r = 0.015  | ns              |
| 2-Back                                         | r = 0.268  | p = 0.001       |
| 3-Back                                         | r = -0.057 | ns              |
| Word-Memory                                    | r = -0.128 | ns              |
| Addition Task                                  | r = -0.053 | ns              |
| Abstract Reasoning                             | r = 0.052  | ns              |
| Negative Affect                                | r = -0.158 | p = 0.033       |
| <b>Sigma/Beta Activity (15.5 - 23 Hz) vs.:</b> | <b>r</b>   | <b>p-values</b> |
| Subjective Sleepiness                          | r = 0.257  | p < 0.001       |
| PVT Median Reaction Times                      | r = 0.328  | p < 0.001       |
| PVT Lapses                                     | r = 0.326  | p < 0.001       |
| Go/No-Go                                       | r = -0.205 | p = 0.005       |
| 2-Back                                         | r = -0.184 | p = 0.018       |
| 3-Back                                         | r = -0.060 | ns              |
| Word-Memory                                    | r = -0.322 | p < 0.001       |
| Addition Task                                  | r = 0.006  | ns              |
| Abstract Reasoning                             | r = -0.055 | ns              |
| Negative Affect                                | r = -0.167 | p = 0.023       |

**Table S3.0. Associations between subjective and objective sleepiness, and cognitive performance.** A correlation analysis was performed on the time course over the 40 h CR. The r and p-values of the correlations between subjective sleepiness and cognitive performance as well as the correlations of EEG frequency ranges with subjective sleepiness and cognitive performance are shown. Correlations were performed with Spearman's Rho since the data was not normally distributed; ns = not significant.

|                                | <b>Baseline Night</b><br>Mean ( $\pm$ SD) | <b>Recovery Night</b><br>Mean ( $\pm$ SD) | <b>F- and p-values</b>         |
|--------------------------------|-------------------------------------------|-------------------------------------------|--------------------------------|
| Time in Bed (TIB; min)         | 478.3 (9.1)                               | 481.9 (4.2)                               | ns                             |
| Total Sleep Time (TST; min)    | 441.5 (42.6)                              | 465.1 (17.8)                              | $F_{1,9} = 5.070, p = 0.049$   |
| Sleep Onset Latency (SOL; min) | 11.0 (9.6)                                | 4.9 (2.5)                                 | $F_{1,9} = 8.152, p = 0.018$   |
| REM Sleep Onset Latency (min)  | 71.7 (30.6)                               | 81.3 (34.6)                               | ns                             |
| N3 Onset Latency (min)         | 8.9 (3.6)                                 | 2.8 (1.9)                                 | $F_{1,22} = 30.753, p < 0.001$ |
| Stage N1 (min)                 | 35.8 (10.0)                               | 22.2 (9.3)                                | $F_{1,12} = 20.894, p = 0.001$ |
| Stage N2 (min)                 | 192.2 (27.9)                              | 174.4 (22.1)                              | $F_{1,10} = 19.271, p = 0.001$ |
| Stage N3 (min)                 | 113.2 (29.8)                              | 167.7 (33.3)                              | $F_{1,12} = 59.252, p < 0.001$ |
| REM Sleep (min)                | 100.4 (28.4)                              | 100.8 (22.5)                              | ns                             |
| NREM (S2+S3)                   | 305.4 (31.6)                              | 342.1 (24.6)                              | $F_{1,11} = 13.191, p = 0.004$ |
| WASO (min)                     | 25.6 (35.8)                               | 12.3 (16.2)                               | ns                             |
| Sleep Efficiency (SE; %)       | 92.3 (8.7)                                | 96.5 (3.7)                                | ns                             |

**Table S4. Polysomnographic sleep recordings.** The first column lists the sleep variables with duration in minutes or %. The second column shows the values for the baseline night; mean ( $\pm$  SD). The third column shows the values for the recovery night; mean ( $\pm$  SD). The fourth column shows the significant F- and p-values. Abbreviations: Time in bed (TIB); Total sleep time (TST, sum of stages N1-3 and REM sleep); Sleep onset latency (SOL); REM sleep onset latency; N3 (deep sleep) onset latency; Stage N1; Stage N2; Stage N3; rapid eye movement (REM) sleep; non-REM (NREM) sleep; WASO = wake after sleep onset; Sleep efficiency (SE; TST / TIB \*100).

## Supplemental Figures

1. PH 1  $\longleftrightarrow$  PH 2  
WMZ 1  $\longleftrightarrow$  WMZ 2
2. WMZ 1  $\longleftrightarrow$  PH 1  
WMZ 2  $\longleftrightarrow$  PH 2
3.  $\frac{\text{WMZ 1}}{\text{PH 1}}$   $\longleftrightarrow$   $\frac{\text{WMZ 2}}{\text{PH 2}}$

**Figure S1. Statistical comparisons of the Wake Maintenance Zone.** This figure gives an overview of the three ways in which the effects of the WMZ on cognitive performance and EEG activity were analyzed. (1.) First, we compared the absolute values between both WMZs and between the previous hours (PH). (2.) Secondly, each WMZ was compared to its respective previous hour. (3.) Finally, each WMZ was expressed relative to its previous hour after which the changes were compared between the two WMZs.

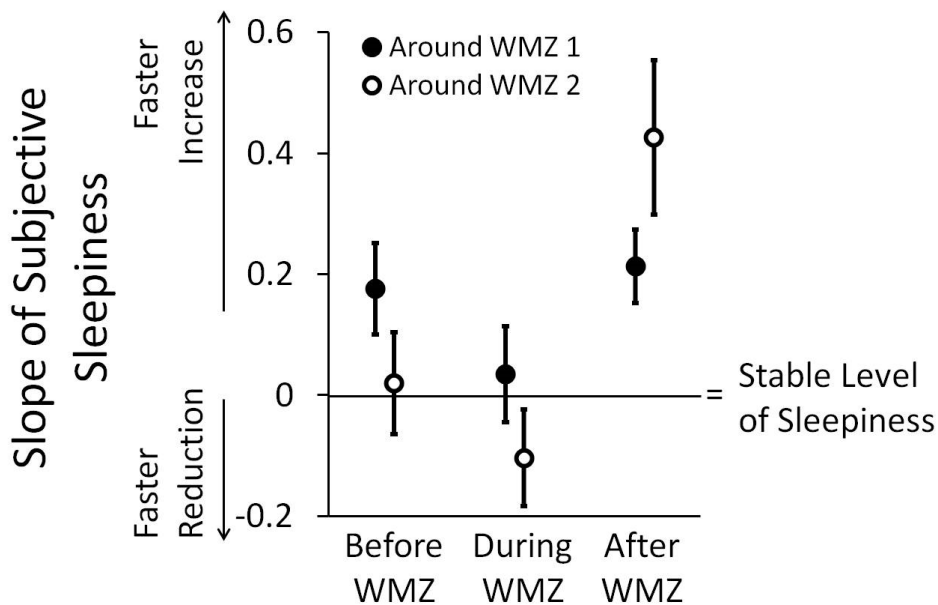

**Figure S2. Slope of Subjective Sleepiness.** Depicted are the slopes of the time course of subjective sleepiness during the 3 h before each WMZ (WMZ 1: CT -6 until CT -3; WMZ 2: CT 18 until CT 21), during the 3 h of each WMZ (WMZ 1: CT -3 until CT 0; WMZ 2: CT 21 until CT 24), and after each WMZ (WMZ 1: CT 0 until CT 2; WMZ 2: CT 24 until end of CR). The y-axis shows the magnitude of the slope of subjective sleepiness on z-transformed values (i.e. the speed of the increase/reduction of sleepiness). A positive slope indicates an increase of sleepiness and a negative slope indicates a reduction of sleepiness. A mixed model analysis showed a significant main effect for a difference between the three time windows ( $F_{2,36} = 8.550$ ,  $p = 0.001$ ) with a significantly steeper slope (i.e. greater increase of sleepiness) after the WMZs compared to the time before and during both WMZs. There was also a significant interaction between 'time window' and 'biological day' ( $F_{2,36} = 3.497$ ,  $p = 0.041$ ) with the post hoc showing a trend for a larger slope after WMZ 2 than after WMZ 1 ( $p = 0.066$ ).

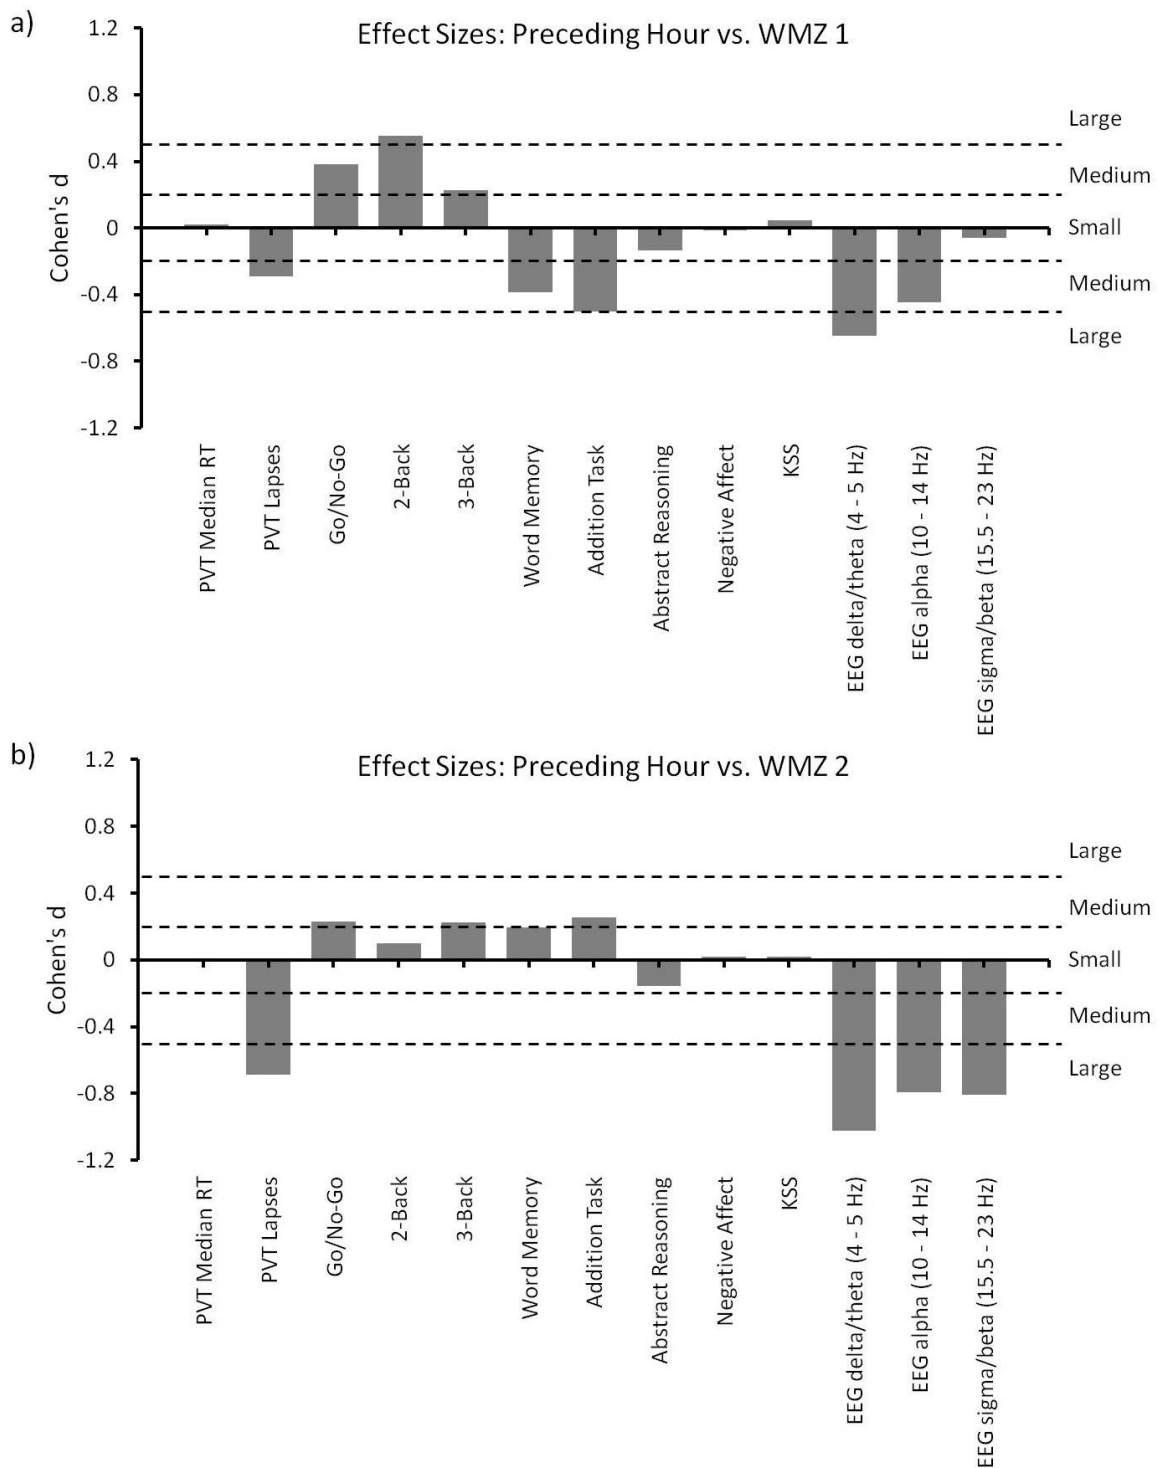

**Figure S3. Effect Sizes.** Depicted are the effect sizes (Cohen's *d*) for the comparison of (a) WMZ 1 versus its preceding hour and (b) WMZ 2 versus its preceding hour. Shown from left to right are: PVT median reaction times in ms; number of PVT lapses; % correct on the Go/No-Go;



% correct on the 2-Back Test; % correct on the 3-Back Test; % correct on the Word-Memory Test; Efficiency on the Addition Task (% correct / reaction time); % correct on the Abstract Reasoning Test; % correct on Negative Affect; subjective sleepiness (KSS); EEG delta/theta activity (4 – 5 Hz); EEG alpha activity (10 – 14 Hz); EEG sigma/beta activity (15.5 – 23 Hz). The dotted lines indicate the cut-offs for the effect size (small < 0.2; medium < 0.5; large > 0.5). A negative effect size indicates a reduction during the WMZ compared to its preceding hour.

### **Saliva samples**

For salivary samples salivettes were used (Salivetten®; Sarstedt Ag & Co.; Nümbrecht; Germany). From these hourly saliva samples (starting 10 min after habitual wake time at the beginning of the CR) the concentration of melatonin was determined with radio-immuno assays by an external laboratory (IBL International GmbH, Hamburg; Germany). The intra-assay coefficients of variability for low- and high-dose control concentration probes were 10.3% and 6.4% (low range: 2.3 – 25.7%; high range: 0.6 – 16.1%). The inter-assay coefficients of variability for low- and high-dose control concentration probes were 12.3 pg/mL and 12.2 pg/mL.
